# Supplementary material for: A formation mechanism of oxygen vacancies in a MnO2 monolayer: a DFT + U study
Source: Royal Society of Chemistry journal article supplement (doi:10.1039/c1cp20634f), 2011-01-01
Supplement: c1cp20634f.pdf [file c1cp20634f.pdf]

## Support Information

### A formation mechanism of oxygen vacancies in a $\text{MnO}_2$ monolayer: A DFT+U study

Chenghua Sun,<sup>a\*</sup> Yong Wang,<sup>b</sup> Jin Zou,<sup>b</sup> Sean C. Smith<sup>a\*</sup>

<sup>5</sup> Received (in XXX, XXX) Xth XXXXXXXXXX 200X, Accepted Xth XXXXXXXXXX 200X

First published on the web Xth XXXXXXXXXX 200X

DOI: 10.1039/b000000x

<sup>a</sup> Centre for Computational Molecular Science, Australian Institute of Bioengineering and Nanotechnology, The University of Queensland, QLD 4072, Brisbane, Australia. Fax: 617 3346 3992; Tel: 617 3346 3949; E-mail: [s.smith@uq.edu.au](mailto:s.smith@uq.edu.au) (S.C. Smith); [c.sun1@uq.edu.au](mailto:c.sun1@uq.edu.au) (C.H. Sun)

<sup>10</sup> <sup>b</sup> Materials Engineering and Centre for Microscopy Microanalysis, The University of Queensland, QLD 4072, Australia

#### <sup>15</sup> S1: Side view of $\text{MnO}_2$ monolayer ( $4 \times 4 \times 1$ supercell)

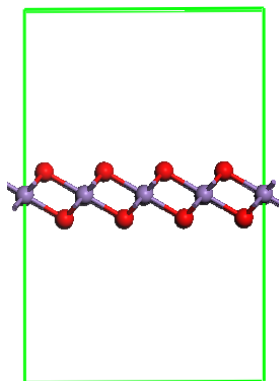

**Fig. S1** Side view of perfect  $\text{MnO}_2$  nanosheets modelled by  $4 \times 4 \times 1$  supercell. Mn and O are indicated

<sup>20</sup> by purple and red spheres.

#### S2: Models of $8 \times 8 \times 1$ supercell (top view)

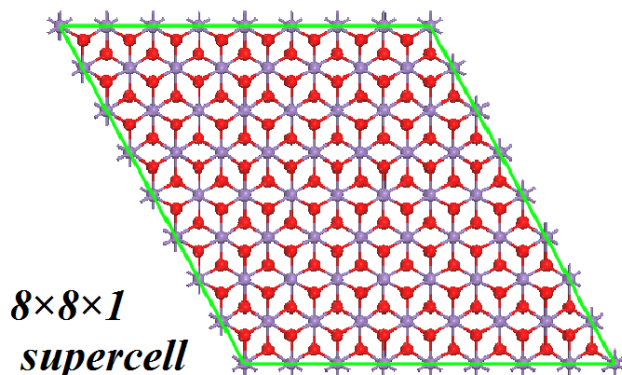

<sup>25</sup> **Fig. S2** Perfect  $\text{MnO}_2$  nanosheets modelled by  $8 \times 8 \times 1$  supercell. Mn and O are indicated by purple and red spheres..

### S3: Calculated reaction energies from $8 \times 8 \times 1$ supercell

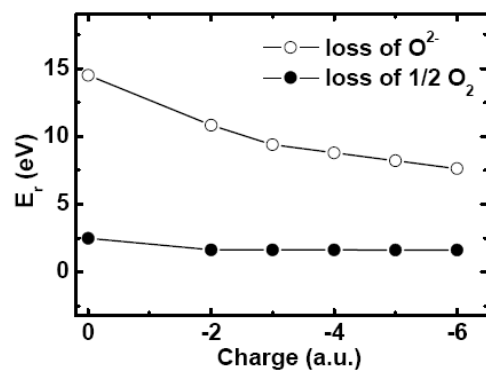

**Fig. S3** Reaction energies ( $E_r$ ) for the release of neutral oxygen molecules and oxygen ions ( $O^{2-}$ )  
s calculated from the  $8 \times 8 \times 1$  supercell with  $U = 4.0$  eV.
